# Supplementary material for: An anode buffer layer with size-controlled Ag nanoparticles for polymer solar cells with improved efficiencies
Source: Royal Society of Chemistry journal article supplement (doi:10.1039/c4ra15343j), 2015-01-01
Supplement: c4ra15343j1.pdf [file c4ra15343j1.pdf]

## Supporting Information

### An Anode Buffer Layer with Size-Controlled Ag Nanoparticles for Polymer Solar Cells with Improved Efficiencies

Dhanavel Ganeshan<sup>a, b</sup>, Shan-Ci Chen<sup>a</sup>, Zhigang Yin<sup>a, b</sup>, Qingdong Zheng<sup>\*a</sup>

<sup>a</sup> State Key Laboratory of Structural Chemistry, Fujian Institute of Research on the Structure of Matter, Chinese Academy of Sciences, 155 Yangqiao West Road, Fuzhou, Fujian 350002, P. R. China

<sup>b</sup> University of Chinese Academy of Sciences, Beijing 100049, P. R. China

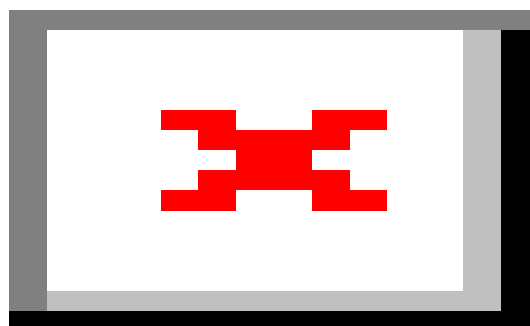

**Fig. S1** (a) UV-vis spectra of Ag NPs with the average size of 4 nm; the insets present a picture of the Ag NPs solution and a TEM image of the Ag NPs (4 nm). Scale bar: 100 nm. (b) HRTEM image of the Ag NPs (10 nm) shown in panel a. Scale bar: 5 nm.

Figure S1 illustrates the silver nanoparticles (Ag NPs) prepared by the sodium borohydride ( $\text{NaBH}_4$ ) reduction of silver nitrate ( $\text{AgNO}_3$ ) in the presence of concentrated citrate at  $70^\circ\text{C}$  (experiment section for more details). TEM image shows that these spherical Ag NPs have narrow size distribution at  $4\pm 0.9$  nm. The sharp extinction at 395 nm and the bright yellowish

solution manifest the characteristic feature from localized surface plasmon resonance (LSPR) of the Ag NPs.<sup>1</sup>

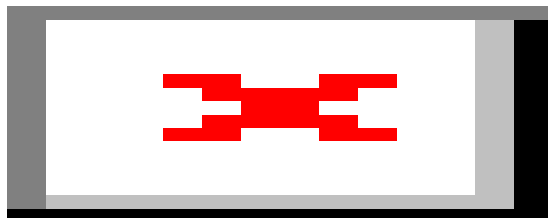

**Fig. S2** SEM images of the quasi-spherical Ag NPs with different sizes: (a) 28 nm; (b) 55 nm; (c) 75 nm.

Figure S2 illustrates scanning electron microscopy (SEM) images and size distribution histograms of the fabricated Ag NPs. The dimensions were analyzed directly from SEM images.

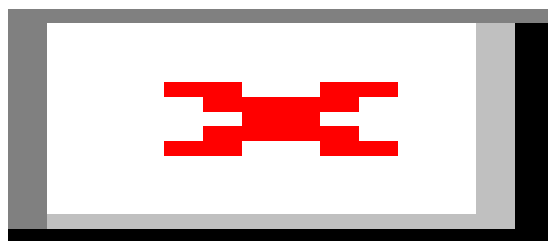

**Fig. S3** Typical (a) TEM images 55 nm size of Ag NPs. (b) HRTEM images of the quasi-spherical Ag NPs shown in panel a. Scale bar: 5 nm, and (c) corresponding SAED pattern taken from a single Ag NP.

Figure S3 illustrates the typical transmission electron microscopy (TEM) and high-resolution transmission electron microscopy (HR-TEM) images for the as-transformed product,

respectively, confirming the interplanar crystal spacing of the Ag NPs. A selected area electron diffraction (SAED) was used to confirm the high crystallinity of the synthesized single NP.<sup>2</sup> PSCs with the average diameter of 55 nm exhibit the best performance, so we verified the origin of particle size by using a field emission transmission electron microscope (FEI Tecnai, G<sup>2</sup> F-20 S-TWIN) operated at 200kV, respectively.

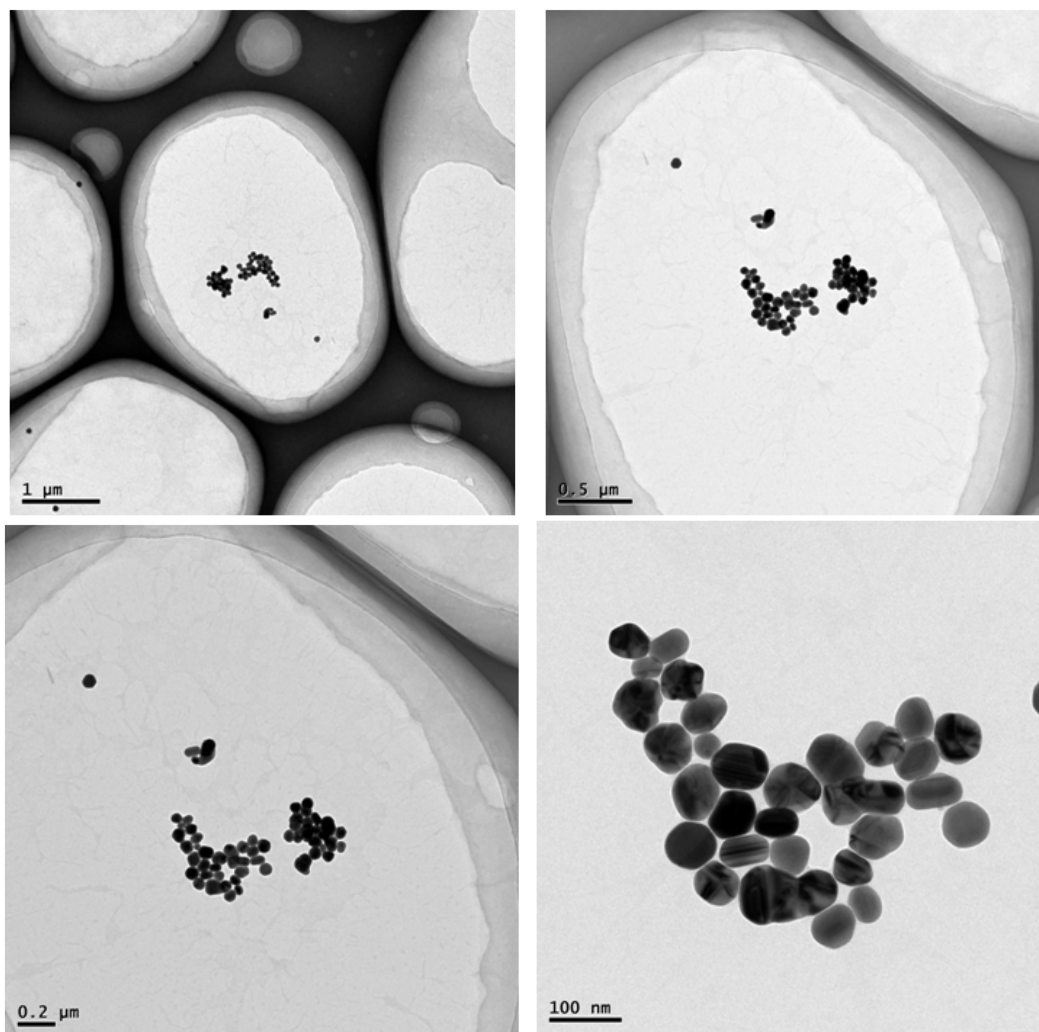

**Fig. S4** Plane-view bright field TEM images of 55 nm size of Ag NPs (different scales) embedded in a PEDOT:PSS solution with a concentration of (5:1, w/w).

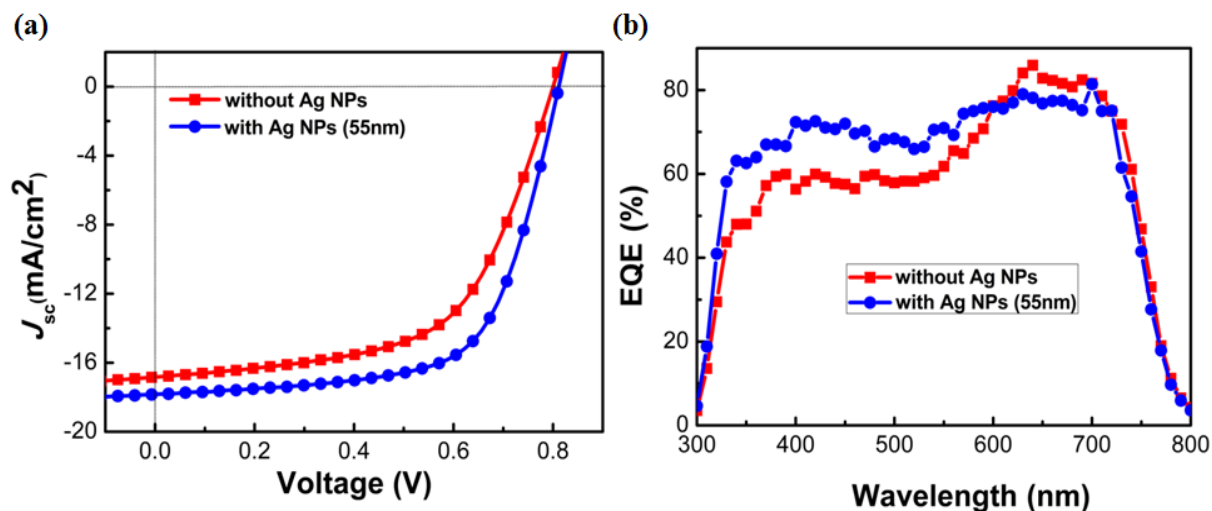

**Fig. S5** The best results of  $J$ - $V$  and EQE characteristics of solar cells with 55 nm Ag NPs and without Ag NPs. (a) The  $J$ - $V$  curves of the best plasmonic PSC (blue circles) and the control device (red squares). (b) The EQE characteristics of a plasmonic PSC (blue circles) and a control device (red squares) of PTB7-Th:PC<sub>71</sub>BM.

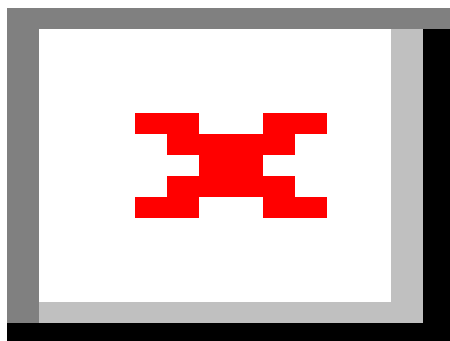

**Fig. S6** AFM 3D height images for ITO/PEDOT:PSS films with/without various sized Ag NPs: (a) control device, (b) 4 nm, (c) 28 nm, (d) 55nm, and (e) 75 nm. The corresponding mean roughnesses (RMS) of these films are 0.948 nm, 0.968 nm, 1.006 nm, 1.027 nm, and 1.246 nm, respectively.

**Table S1** The measured current densities and calculated current densities from external quantum efficiency measurement.

| Devices        | $J_{sc}(J-V)$<br>[mA/cm <sup>2</sup> ] | $J_{sc}(EQE)$<br>[mA/cm <sup>2</sup> ] | Error<br>[%] |
|----------------|----------------------------------------|----------------------------------------|--------------|
| Control device | 16.81                                  | 16.78                                  | 0.2          |
| Ag NPs (4 nm)  | 17.47                                  | 16.82                                  | 3.7          |
| Ag NPs (28 nm) | 17.65                                  | 16.98                                  | 3.8          |
| Ag NPs (55 nm) | 17.82                                  | 17.48                                  | 1.9          |
| Ag NPs (75 nm) | 18.07                                  | 17.94                                  | 0.7          |

**References:**

1. Y. Wan, Z. Guo, X. Jiang, K. Fang, X. Lu, Y. Zhang and N. Gu, *J. Colloid Interface Sci.*, 2013, **394**, 263-268.
2. S. Agnihotri, S. Mukherji and S. Mukherji, *RSC Advances*, 2014, **4**, 3974-3983.
